# Supplementary material
Source: PubMed Central journal article supplement (PMC2938154)
Supplement: pp.110.159103_1.pdf [file pp.110.159103_1.pdf]

|         |                                                     |        |
|---------|-----------------------------------------------------|--------|
|         |                                                     | R<br>↑ |
| AtYSL3  | AVLSWGIMWPLIKGLKGDWFPSTLPENSMKSLNGYKVFISISLILGDGLY  |        |
| ZmYS1   | AILSWGILWPLISKQKGEWYPANIPESMKSLEYGYKAFICIALIMGDGTY  |        |
| AtYSL1  | AILSYGLMWPLLDKLGKSWFPDNLDEHNMKSIYGYKVFLSVALIILGDGLY |        |
| AtYSL2  | AILSWGIMWPLIARLKGEWFPATLKDNSMQGLNGYKVFICIALIILGDGLY |        |
| AtYSL4  | AILSWGFLWPFISQHAGDWYPADLKANDFKGLYGYKVFIASIIILGDGLY  |        |
| AtYSL5  | GILSWGIMWPLIETKKGDWFPDNPSSSMHGLQAYKVFIAVAIILGDGLY   |        |
| AtYSL6  | AILSWGILWPFVVSQHAGDWYPADLGSNDFKGLYGYKVFIATAIILGDGLY |        |
| AtYSL7  | AILSWGVMWPLIGAQKQKQWYAADLSSTSLHGLQGYRVFIAMILGDGLY   |        |
| AtYSL8  | GILSWGIMWPLIETRKGDWFPSPNVDSSSMNGLQAYKVFIAVATILGDGLY |        |
| OsYSL1  | SISSSGFIWPAALQAKQGEWYTDSP-TSFKGINGYKVPMGVSMVLGDCLF  |        |
| OsYSL2  | AILSWGIMWPLISIQKQKQWYPGNVPESSMTSLFGYKSFMCVALIMGDGLY |        |
| OsYSL3  | AILSWGFLYPFLETKRQWYQTDSP-TSLNGQNGYKVFISVTLIITDGM    |        |
| OsYSL4  | AILSWGFLYPYLETKHGEWYQTDSP-SNLDGLNGYKVFISVTLIVTDGLI  |        |
| OsYSL5  | SVISWGFLWPFIAKQAGDWYPDNLSNTDFRGLYGYKVFIASVILGDGLY   |        |
| OsYSL6  | AILSWGFLWPYISTKAGDWYPANLGSNDFKGLYGYKVFISVSVILGDGLY  |        |
| OsYSL7  | TIISCGVIWPHYESKEGIWYPSNLGPNSLNGIRGYKVFISGLSMIMADCLF |        |
| OsYSL8  | SVVSWGIMWPHYESKKGWYDAGLPKSSLHGLNGYQVFISIAMIVGDGLF   |        |
| OsYSL9  | AILSWGVMWPLISDLKGDWYSADIPESSMKSLEQYKAFICVALIILGDGLY |        |
| OsYSL10 | GVMSWGIMWPLIEHKKGDWYPADLKPSSLRGIVGYRVFISISLILGDGLY  |        |
| OsYSL11 | GILSWGIMWPLISKKKGSWYPETLPESSLLGLQAYKVFITIAVILGDGLY  |        |
| OsYSL12 | GILSWGIMWPLIRNKKGSWYAASLSETSLHGLQGYRVFISIALIILGDGLY |        |
| OsYSL13 | GILSWGIMWPLIAKKRGDWFSADLPDGS LHGMQGYRVFIATAIILGDGLY |        |
| OsYSL14 | GILSWGVMWPLIAKKKGSWYPADISDNLHGLQAYRVFISIALIILGDGLY  |        |
| OsYSL15 | AVISWGIMWPLISKHKGDWYPANIPESMSTSLYGYKSFICIALIMGDGLY  |        |
| OsYSL16 | AILSWGIMWPLIGKQKGNWYSAKASESSMGLFGYKSFICIALLVGDGFY   |        |
| OsYSL17 | SIVSWGILWPHYETKAGRWFPENLDANDLGGIMGYRVFVGVSMILADGLF  |        |
| OsYSL18 | SIISWGIMRPYIRSKRGIWYDADLQETNLKSFSGYKVFCAIAMILGDGIF  |        |
|         | : * * . : * : * * : . : . . * : : : * :             |        |

Supplemental Figure 1. The sequence of the protein encoded by the AtYSL3 cDNA. Residues 289-338 of the AtYSL3 protein are shown. One change relative to the sequence of Col0 At5g53550 was found in the cDNA that resulted in the change of a lysine residue to an arginine residue (shown at top). For comparison, the sequences of all other Arabidopsis and rice YSLs are shown. At bottom, "\*" indicates perfect conservation; ":" indicates that conserved substitutions are observed; "." indicates that semi-conserved substitutions are observed.

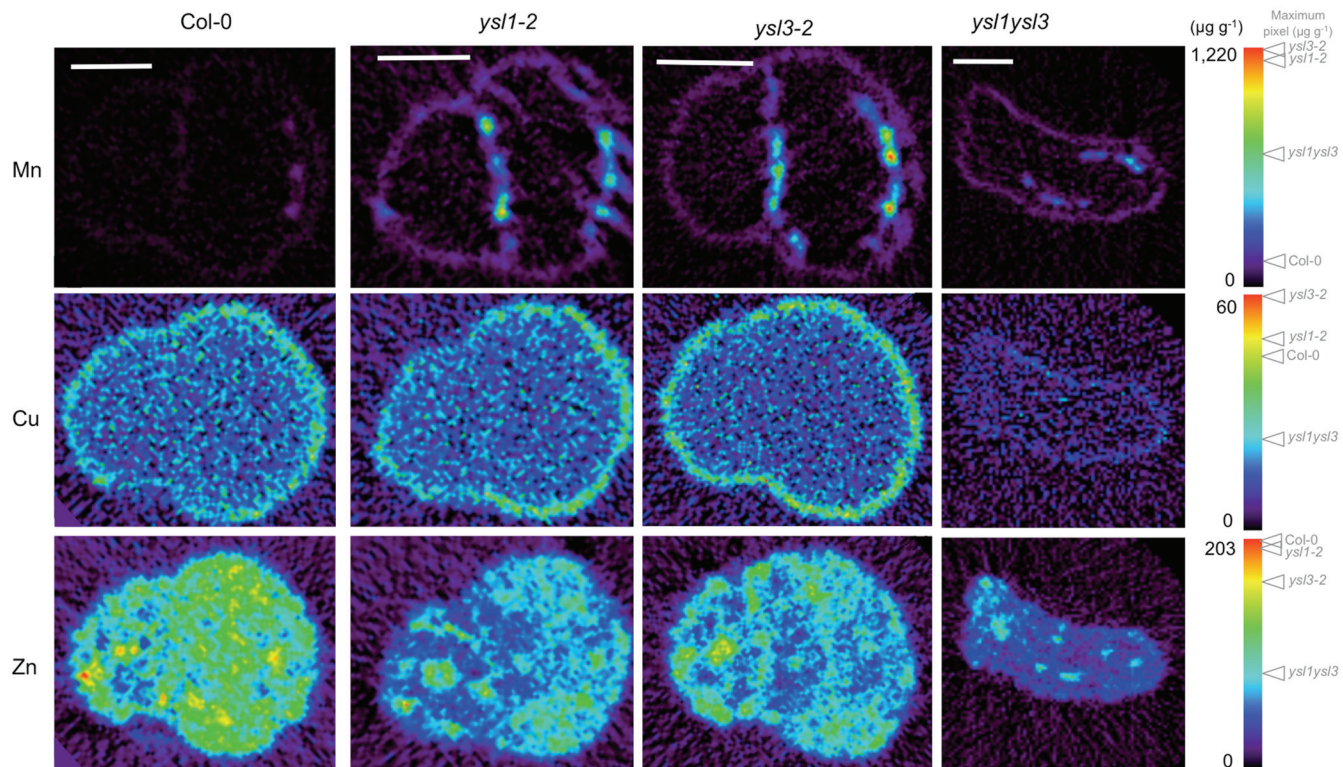

Supplemental Figure 2. Synchrotron X-ray Fluorescence Computed Microtomography showing the distribution and abundance (in  $\mu\text{g g}^{-1}$ ) of Mn, Cu and Zn. Tomograms (virtual cross sections) were collected via SXRF computed microtomography from intact, dry *Arabidopsis* seed. All seeds are oriented with the radicle at left and cotyledons at right. Scale bars are 100  $\mu\text{m}$ .
